# Supplementary material for: Comparative Analysis of Pyrosequencing and a Phylogenetic Microarray for Exploring Microbial Community Structures in the Human Distal Intestine
Source: PLoS One. 2009 Aug 20;4(8):e6669. doi: 10.1371/journal.pone.0006669 (PMC2725325; doi:10.1371/journal.pone.0006669)
Supplement: Table S1 — All 153 genera detected using the RDP-classifier with at least 50% bootstrap support. (0.04 MB XLS) [file pone.0006669.s001.xls]

## Sheet: Table S1
All genera assigned using the RDP-classifier with at least 50% as boostrap support
Genus	A-V4-0.5	B-V4-0.5	A-V6-1.0	B-V6-1.0	C-V4-0.5	D-V4-0.5	C-V4-0.1	D-V4-0.1
Actinobacteria_Actinobacteria_Actinomycetales_Actinomycetaceae_ACTINOMYCES	9	30	22	56	4	4	0	2
Actinobacteria_Actinobacteria_Actinomycetales_Actinomycetaceae_MOBILUNCUS	0	0	0	4	0	0	0	0
Actinobacteria_Actinobacteria_Actinomycetales_Actinomycetaceae_VARIBACULUM	0	1	0	0	0	0	0	0
Actinobacteria_Actinobacteria_Actinomycetales_Corynebacteriaceae_CORYNEBACTERIUM	0	1	1	0	0	0	0	0
Actinobacteria_Actinobacteria_Actinomycetales_Microbacteriaceae_MICROBACTERIUM	0	0	0	1	0	0	0	0
Actinobacteria_Actinobacteria_Actinomycetales_Microbacteriaceae_MICROCELLA	0	0	5	7	0	0	0	0
Actinobacteria_Actinobacteria_Actinomycetales_Micrococcaceae_ROTHIA	1	4	19	6	1	0	0	0
Actinobacteria_Actinobacteria_Bifidobacteriales_Bifidobacteriaceae_BIFIDOBACTERIUM	402	326	575	480	2158	106	492	18
Actinobacteria_Actinobacteria_Bifidobacteriales_Bifidobacteriaceae_PARASCARDOVIA	0	2	0	2	0	0	0	0
Actinobacteria_Actinobacteria_Bifidobacteriales_Bifidobacteriaceae_SCARDOVIA	0	2	0	0	0	0	0	0
Actinobacteria_Actinobacteria_Coriobacteriales_Coriobacteriaceae_ATOPOBIUM	0	0	2	3	1	0	0	0
Actinobacteria_Actinobacteria_Coriobacteriales_Coriobacteriaceae_COLLINSELLA	0	0	199	205	0	0	0	0
Actinobacteria_Actinobacteria_Coriobacteriales_Coriobacteriaceae_EGGERTHELLA	1	2	0	15	14	0	4	0
Actinobacteria_Actinobacteria_Coriobacteriales_Coriobacteriaceae_OLSENELLA	0	0	38	1	0	0	0	0
Actinobacteria_Actinobacteria_Coriobacteriales_Coriobacteriaceae_SLACKIA	4	2	4	0	0	0	0	0
Bacteroidetes_Bacteroidetes_Bacteroidales_Bacteroidaceae_ANAEROPHAGA	699	6	0	0	4	0	4	0
Bacteroidetes_Bacteroidetes_Bacteroidales_Bacteroidaceae_BACTEROIDES	10215	17256	8345	26321	35	98553	8	22402
Bacteroidetes_Bacteroidetes_Bacteroidales_Porphyromonadaceae_PARABACTEROIDES	817	398	377	1	11	11200	0	2503
Bacteroidetes_Bacteroidetes_Bacteroidales_Porphyromonadaceae_PORPHYROMONAS	1	0	3	0	0	0	0	0
Bacteroidetes_Bacteroidetes_Bacteroidales_Prevotellaceae_HALLELLA	2	0	0	0	0	0	0	0
Bacteroidetes_Bacteroidetes_Bacteroidales_Prevotellaceae_PREVOTELLA	4347	28	4496	59	5	0	2	0
Bacteroidetes_Bacteroidetes_Bacteroidales_Rikenellaceae_ALISTIPES	1339	3963	393	1696	33441	4514	8074	946
Bacteroidetes_Bacteroidetes_Bacteroidales_Rikenellaceae_RIKENELLA	0	83	0	56	1	341	0	65
Bacteroidetes_Flavobacteria_Flavobacteriales_Flavobacteriaceae_CHRYSEOBACTERIUM	0	1	0	1	2	0	0	0
Cyanobacteria_Cyanobacteria_Cyanobacteria_Chloroplast_STREPTOPHYTA	95	15	33	18	2	1	0	0
Deinococcus-Thermus_Deinococci_Thermales_Thermaceae_THERMUS	0	0	0	1	0	0	0	0
Firmicutes_Bacilli_Bacillales_Incertae Sedis XI_GEMELLA	3	1	7	6	0	1	0	0
Firmicutes_Bacilli_Bacillales_Paenibacillaceae_COHNELLA	0	0	6	0	0	0	0	0
Firmicutes_Bacilli_Bacillales_Planococcaceae_CARYOPHANON	0	0	1	0	0	0	0	0
Firmicutes_Bacilli_Bacillales_Planococcaceae_KURTHIA	0	0	2	0	0	0	0	0
Firmicutes_Bacilli_Bacillales_Staphylococcaceae_JEOTGALICOCCUS	0	0	0	22	0	0	0	0
Firmicutes_Bacilli_Bacillales_Thermoactinomycetaceae_MECHERCHARIMYCES	0	0	2	0	0	0	0	0
Firmicutes_Bacilli_Lactobacillales_Aerococcaceae_ABIOTROPHIA	0	3	1	1	0	0	0	0
Firmicutes_Bacilli_Lactobacillales_Aerococcaceae_DOLOSICOCCUS	0	0	74	31	0	0	0	0
Firmicutes_Bacilli_Lactobacillales_Aerococcaceae_FACKLAMIA	0	0	0	1	0	0	0	0
Firmicutes_Bacilli_Lactobacillales_Aerococcaceae_IGNAVIGRANUM	0	0	1	1	0	0	0	0
Firmicutes_Bacilli_Lactobacillales_Carnobacteriaceae_ALLOFUSTIS	0	0	3	3	0	0	0	0
Firmicutes_Bacilli_Lactobacillales_Carnobacteriaceae_GRANULICATELLA	6	2	3	6	1	4	1	6
Firmicutes_Bacilli_Lactobacillales_Enterococcaceae_ENTEROCOCCUS	0	0	0	0	79	0	15	0
Firmicutes_Bacilli_Lactobacillales_Lactobacillaceae_LACTOBACILLUS	0	7	2	0	356	1	75	0
Firmicutes_Bacilli_Lactobacillales_Lactobacillaceae_PARALACTOBACILLUS	0	0	0	0	1	0	0	0
Firmicutes_Bacilli_Lactobacillales_Leuconostocaceae_LEUCONOSTOC	6	34	18	171	28	12	4	0
Firmicutes_Bacilli_Lactobacillales_Leuconostocaceae_OENOCOCCUS	0	0	0	1	0	0	0	0
Firmicutes_Bacilli_Lactobacillales_Streptococcaceae_LACTOCOCCUS	2	3	9	19	2	0	0	1
Firmicutes_Bacilli_Lactobacillales_Streptococcaceae_LACTOVUM	0	0	3	6	0	0	0	0
Firmicutes_Bacilli_Lactobacillales_Streptococcaceae_STREPTOCOCCUS	55	77	88	141	373	172	83	35
Firmicutes_Clostridia_Clostridiales_Clostridiaceae_ALKALIPHILUS	15	25	0	0	0	0	0	0
Firmicutes_Clostridia_Clostridiales_Clostridiaceae_ANAEROBACTER	0	1	0	256	1	0	0	0
Firmicutes_Clostridia_Clostridiales_Clostridiaceae_CLOSTRIDIUM	506	2818	872	1896	1788	1894	468	384
Firmicutes_Clostridia_Clostridiales_Clostridiaceae_NATRONINCOLA	0	3	0	0	0	0	0	0
Firmicutes_Clostridia_Clostridiales_Clostridiaceae_OXOBACTER	25	31	0	0	0	2	0	3
Firmicutes_Clostridia_Clostridiales_Clostridiaceae_SARCINA	2	2	0	0	2	6	0	2
Firmicutes_Clostridia_Clostridiales_Clostridiaceae_THERMOBRACHIUM	1	0	0	0	1	0	0	0
Firmicutes_Clostridia_Clostridiales_Clostridiaceae_TINDALLIA	0	0	388	306	0	0	0	0
Firmicutes_Clostridia_Clostridiales_Eubacteriaceae_ANAEROFUSTIS	1	1	0	1	1	0	0	0
Firmicutes_Clostridia_Clostridiales_Gracilibacteraceae_GRACILIBACTER	7	0	0	0	0	0	0	0
Firmicutes_Clostridia_Clostridiales_Incertae Sedis XI_ANAEROCOCCUS	1	0	1	0	1824	0	436	0
Firmicutes_Clostridia_Clostridiales_Incertae Sedis XI_FINEGOLDIA	1	4	0	0	0	0	1	0
Firmicutes_Clostridia_Clostridiales_Incertae Sedis XI_PARVIMONAS	1	1	0	0	0	0	0	0
Firmicutes_Clostridia_Clostridiales_Incertae Sedis XI_PEPTONIPHILUS	2	3	0	3	0	0	0	0
Firmicutes_Clostridia_Clostridiales_Incertae Sedis XII_ACIDAMINOBACTER	2	30	0	0	0	0	0	0
Firmicutes_Clostridia_Clostridiales_Incertae Sedis XII_FUSIBACTER	0	0	0	3	0	0	0	0
Firmicutes_Clostridia_Clostridiales_Incertae Sedis XIII_ANAEROVORAX	13	121	0	1	0	6	0	2
Firmicutes_Clostridia_Clostridiales_Incertae Sedis XIII_MOGIBACTERIUM	9	5	0	2	2	3	0	1
Firmicutes_Clostridia_Clostridiales_Lachnospiraceae_ACETITOMACULUM	0	5	0	0	1	1	1	0
Firmicutes_Clostridia_Clostridiales_Lachnospiraceae_ANAEROSTIPES	396	629	0	0	479	409	92	89
Firmicutes_Clostridia_Clostridiales_Lachnospiraceae_BRYANTELLA	204	402	1	5	72	142	18	19
Firmicutes_Clostridia_Clostridiales_Lachnospiraceae_CATONELLA	0	0	1	0	0	0	0	0
Firmicutes_Clostridia_Clostridiales_Lachnospiraceae_COPROCOCCUS	11305	2096	2027	820	7	128	3	25
Firmicutes_Clostridia_Clostridiales_Lachnospiraceae_DOREA	1630	3037	2927	5478	1220	3010	319	592
Firmicutes_Clostridia_Clostridiales_Lachnospiraceae_HESPELLIA	61	60	1	6	0	1	0	1
Firmicutes_Clostridia_Clostridiales_Lachnospiraceae_LACHNOBACTERIUM	695	583	1	0	1	41	0	7
Firmicutes_Clostridia_Clostridiales_Lachnospiraceae_LACHNOSPIRA	800	953	2012	2512	8237	395	1966	118
Firmicutes_Clostridia_Clostridiales_Lachnospiraceae_LACHNOSPIRACEAE INCERTAE SEDIS	23137	49387	1391	364	24136	12823	5969	2608
Firmicutes_Clostridia_Clostridiales_Lachnospiraceae_MORYELLA	1	3	2612	2425	0	1	0	0
Firmicutes_Clostridia_Clostridiales_Lachnospiraceae_ORIBACTERIUM	9	5	676	595	119	1	22	1
Firmicutes_Clostridia_Clostridiales_Lachnospiraceae_PARASPOROBACTERIUM	321	20	126	30	12	1	1	1
Firmicutes_Clostridia_Clostridiales_Lachnospiraceae_PSEUDOBUTYRIVIBRIO	434	62	21	59	1	53	0	12
Firmicutes_Clostridia_Clostridiales_Lachnospiraceae_ROSEBURIA	20051	4073	21294	7060	17945	8279	4317	1893
Firmicutes_Clostridia_Clostridiales_Lachnospiraceae_SHUTTLEWORTHIA	0	1	30	161	0	0	0	0
Firmicutes_Clostridia_Clostridiales_Lachnospiraceae_SPOROBACTERIUM	0	0	580	1612	0	0	0	0
Firmicutes_Clostridia_Clostridiales_Lachnospiraceae_SYNTROPHOCOCCUS	2	0	1014	3262	0	0	0	0
Firmicutes_Clostridia_Clostridiales_Peptococcaceae_DEHALOBACTER	0	0	32	30	0	0	0	0
Firmicutes_Clostridia_Clostridiales_Peptococcaceae_DESULFONISPORA	0	0	0	3	0	0	0	0
Firmicutes_Clostridia_Clostridiales_Peptococcaceae_PEPTOCOCCUS	132	0	1	71	0	16	0	6
Firmicutes_Clostridia_Clostridiales_Peptostreptococcaceae_PEPTOSTREPTOCOCCACEAE INCERTAE SEDIS	142	10338	223	11234	10603	1213	2575	262
Firmicutes_Clostridia_Clostridiales_Peptostreptococcaceae_PEPTOSTREPTOCOCCUS	0	0	2	4	0	0	0	0
Firmicutes_Clostridia_Clostridiales_Ruminococcaceae_ACETANAEROBACTERIUM	13	58	0	0	404	40	97	4
Firmicutes_Clostridia_Clostridiales_Ruminococcaceae_ACETIVIBRIO	166	3	0	0	0	0	0	0
Firmicutes_Clostridia_Clostridiales_Ruminococcaceae_ANAEROFILUM	3	77	0	0	7	3	4	0
Firmicutes_Clostridia_Clostridiales_Ruminococcaceae_ANAEROTRUNCUS	32	155	8	14	27	81	4	16
Firmicutes_Clostridia_Clostridiales_Ruminococcaceae_ETHANOLIGENENS	7	369	0	0	146	9	35	2
Firmicutes_Clostridia_Clostridiales_Ruminococcaceae_FAECALIBACTERIUM	17013	8375	7298	1324	29472	3936	6994	818
Firmicutes_Clostridia_Clostridiales_Ruminococcaceae_PAPILLIBACTER	856	610	7748	11500	21	278	3	65
Firmicutes_Clostridia_Clostridiales_Ruminococcaceae_RUMINOCOCCACEAE INCERTAE SEDIS	4592	2136	119	73	1279	110	307	24
Firmicutes_Clostridia_Clostridiales_Ruminococcaceae_RUMINOCOCCUS	6780	9656	1658	8635	981	6485	247	1353
Firmicutes_Clostridia_Clostridiales_Ruminococcaceae_SPOROBACTER	5655	7344	101	101	111	1557	30	307
Firmicutes_Clostridia_Clostridiales_Ruminococcaceae_SUBDOLIGRANULUM	871	805	2142	4790	115	405	21	103
Firmicutes_Clostridia_Clostridiales_Veillonellaceae_ACIDAMINOCOCCUS	1501	24	0	0	1	0	0	0
Firmicutes_Clostridia_Clostridiales_Veillonellaceae_ANAEROGLOBUS	0	5	0	0	0	3	0	0
Firmicutes_Clostridia_Clostridiales_Veillonellaceae_DIALISTER	29	2441	17	2098	0	60	0	10
Firmicutes_Clostridia_Clostridiales_Veillonellaceae_MEGASPHAERA	0	0	0	0	0	0	0	2
Firmicutes_Clostridia_Clostridiales_Veillonellaceae_PROPIONISPIRA	36	311	0	0	0	0	0	0
Firmicutes_Clostridia_Clostridiales_Veillonellaceae_SELENOMONAS	0	0	0	0	0	1	0	0
Firmicutes_Clostridia_Clostridiales_Veillonellaceae_VEILLONELLA	4	33	2	16	101	10	21	1
Firmicutes_Erysipelotrichi_Erysipelotrichales_Erysipelotrichaceae_BULLEIDIA	52	8	39	19	0	0	0	0
Firmicutes_Erysipelotrichi_Erysipelotrichales_Erysipelotrichaceae_CATENIBACTERIUM	1338	921	2359	1184	19	1333	4	322
Firmicutes_Erysipelotrichi_Erysipelotrichales_Erysipelotrichaceae_COPROBACILLUS	54	53	0	0	109	62	26	10
Firmicutes_Erysipelotrichi_Erysipelotrichales_Erysipelotrichaceae_ERYSIPELOTRICHACEAE INCERTAE SEDIS	2469	557	3	14	2131	5869	503	1301
Firmicutes_Erysipelotrichi_Erysipelotrichales_Erysipelotrichaceae_HOLDEMANIA	71	153	11	0	751	43	190	3
Firmicutes_Erysipelotrichi_Erysipelotrichales_Erysipelotrichaceae_TURICIBACTER	0	221	0	255	1	5	0	2
Fusobacteria_Fusobacteria_Fusobacteriales_Fusobacteriaceae_FUSOBACTERIUM	0	0	0	0	0	2	0	0
Lentisphaerae_Lentisphaerae_Victivallales_Victivallaceae_VICTIVALLIS	0	1	0	0	0	7	0	1
Proteobacteria_Alphaproteobacteria_Rickettsiales_Rickettsiaceae_ORIENTIA	206	0	0	0	0	0	0	0
Proteobacteria_Betaproteobacteria_Burkholderiales_Alcaligenaceae_SUTTERELLA	159	1	1097	2	0	0	0	0
Proteobacteria_Betaproteobacteria_Burkholderiales_Burkholderiaceae_LIMNOBACTER	0	0	0	1	0	0	0	0
Proteobacteria_Betaproteobacteria_Burkholderiales_Burkholderiaceae_POLYNUCLEOBACTER	0	0	44	95	0	0	0	0
Proteobacteria_Betaproteobacteria_Burkholderiales_Comamonadaceae_CALDIMONAS	0	0	1	0	0	0	0	0
Proteobacteria_Betaproteobacteria_Burkholderiales_Comamonadaceae_COMAMONAS	0	3	1	2	0	0	0	0
Proteobacteria_Betaproteobacteria_Burkholderiales_Comamonadaceae_MALIKIA	0	0	0	2	0	0	0	0
Proteobacteria_Betaproteobacteria_Burkholderiales_Oxalobacteraceae_OXALOBACTER	0	0	0	0	0	4	0	0
Proteobacteria_Betaproteobacteria_Neisseriales_Neisseriaceae_MICROVIRGULA	0	0	0	4	0	0	0	0
Proteobacteria_Betaproteobacteria_Neisseriales_Neisseriaceae_NEISSERIA	1	0	0	0	0	0	0	0
Proteobacteria_Betaproteobacteria_Rhodocyclales_Rhodocyclaceae_PROPIONIVIBRIO	0	0	0	1	0	0	0	0
Proteobacteria_Deltaproteobacteria_Desulfobacterales_Desulfobulbaceae_DESULFORHOPALUS	0	0	6	0	0	0	0	0
Proteobacteria_Deltaproteobacteria_Desulfovibrionales_Desulfovibrionaceae_BILOPHILA	6	18	13	107	0	0	0	0
Proteobacteria_Deltaproteobacteria_Desulfovibrionales_Desulfovibrionaceae_DESULFOVIBRIO	0	0	0	0	1	0	0	0
Proteobacteria_Gammaproteobacteria_Aeromonadales_Aeromonadaceae_AEROMONAS	0	0	0	1	0	0	0	0
Proteobacteria_Gammaproteobacteria_Aeromonadales_Succinivibrionaceae_SUCCINIVIBRIO	0	0	0	0	74	0	21	0
Proteobacteria_Gammaproteobacteria_Enterobacteriales_Enterobacteriaceae_BUTTIAUXELLA	0	0	0	1	0	0	0	0
Proteobacteria_Gammaproteobacteria_Enterobacteriales_Enterobacteriaceae_CITROBACTER	1	7	0	0	1	0	0	0
Proteobacteria_Gammaproteobacteria_Enterobacteriales_Enterobacteriaceae_ESCHERICHIA	0	0	3	35	61	0	14	0
Proteobacteria_Gammaproteobacteria_Enterobacteriales_Enterobacteriaceae_KLEBSIELLA	0	1	1	40	0	9	0	2
Proteobacteria_Gammaproteobacteria_Enterobacteriales_Enterobacteriaceae_KLUYVERA	0	0	0	1	0	0	0	0
Proteobacteria_Gammaproteobacteria_Enterobacteriales_Enterobacteriaceae_PANTOEA	0	0	0	1	0	0	0	0
Proteobacteria_Gammaproteobacteria_Enterobacteriales_Enterobacteriaceae_PROTEUS	0	0	0	1	1	0	0	0
Proteobacteria_Gammaproteobacteria_Enterobacteriales_Enterobacteriaceae_RAOULTELLA	0	0	0	2	0	0	0	0
Proteobacteria_Gammaproteobacteria_Enterobacteriales_Enterobacteriaceae_SHIGELLA	0	8	0	0	18808	106	4418	22
Proteobacteria_Gammaproteobacteria_Enterobacteriales_Enterobacteriaceae_YERSINIA	0	0	0	3	0	0	0	0
Proteobacteria_Gammaproteobacteria_Pasteurellales_Pasteurellaceae_ACTINOBACILLUS	17	710	0	1	0	1043	0	165
Proteobacteria_Gammaproteobacteria_Pasteurellales_Pasteurellaceae_AGGREGATIBACTER	0	0	0	20	0	0	0	0
Proteobacteria_Gammaproteobacteria_Pasteurellales_Pasteurellaceae_HAEMOPHILUS	0	0	0	0	0	7	0	1
Proteobacteria_Gammaproteobacteria_Pasteurellales_Pasteurellaceae_MANNHEIMIA	2	8	0	0	0	0	0	0
Proteobacteria_Gammaproteobacteria_Pasteurellales_Pasteurellaceae_NICOLETELLA	0	0	0	0	0	1	0	0
Proteobacteria_Gammaproteobacteria_Pasteurellales_Pasteurellaceae_PASTEURELLA	0	1	0	0	0	0	0	0
Proteobacteria_Gammaproteobacteria_Pseudomonadales_Incertae sedis 6_ENHYDROBACTER	0	0	0	1	0	0	0	0
Proteobacteria_Gammaproteobacteria_Pseudomonadales_Moraxellaceae_ACINETOBACTER	0	2	3	16	3	4	1	0
Proteobacteria_Gammaproteobacteria_Pseudomonadales_Pseudomonadaceae_CELLVIBRIO	0	0	0	1	0	0	0	0
Proteobacteria_Gammaproteobacteria_Vibrionales_Vibrionaceae_BENECKEA	0	0	1	80	0	0	0	0
Proteobacteria_Gammaproteobacteria_Xanthomonadales_Xanthomonadaceae_DYELLA	0	0	0	1	0	0	0	0
Proteobacteria_Gammaproteobacteria_Xanthomonadales_Xanthomonadaceae_LYSOBACTER	0	0	0	1	0	0	0	0
TM7_TM7_TM7_TM7_TM7_GENERA_INCERTAE_SEDIS	1	15	0	0	0	0	0	0
Verrucomicrobia_Verrucomicrobiae_Verrucomicrobiales_Verrucomicrobiaceae_AKKERMANSIA	9	2452	1	9340	1	1	0	0
